# Supplementary material for: The Transition from Primary siRNAs to Amplified Secondary siRNAs That Regulate Chalcone Synthase During Development of Glycine max Seed Coats
Source: PubMed Central journal article supplement (PMC3804491; doi:10.1371/journal.pone.0076954), 2013-10-21

**A** 4 DAF whole seed

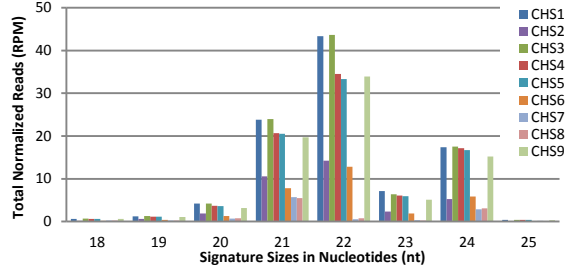

**B** 12-14 DAF whole seed

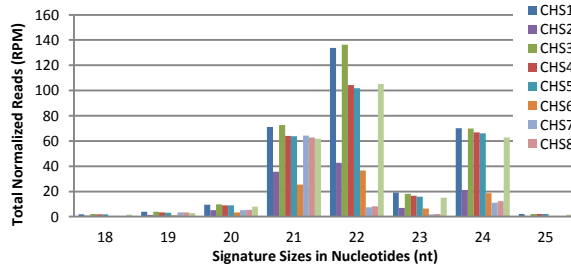

**C** 22-24 DAF whole seed

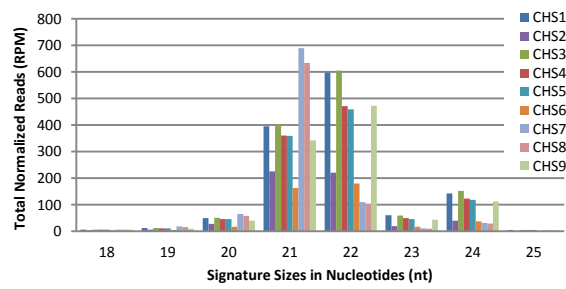

**D** 5-6 mg seed weight seed coat

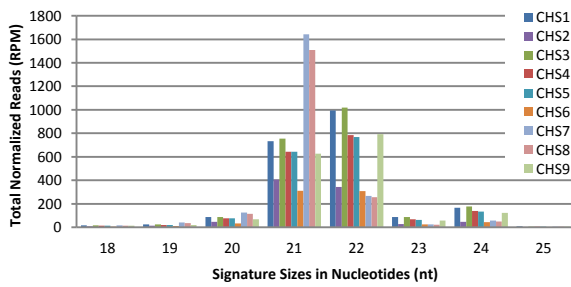

**E** 50-75 mg seed weight seed coat

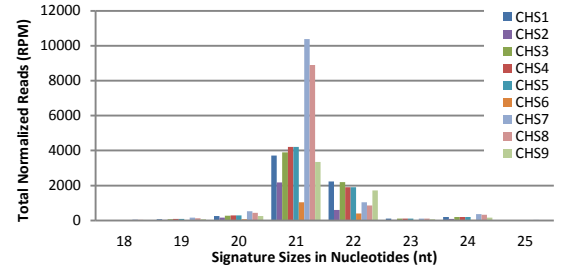

**F** 75-100 mg seed weight seed coat

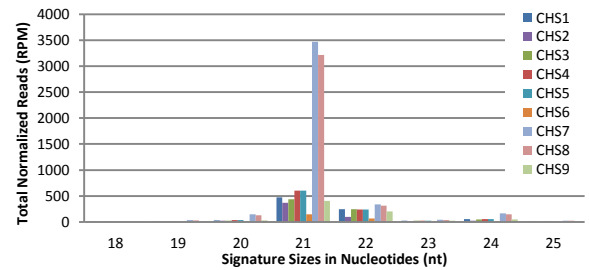

**G** 200-300 mg seed weight seed coat

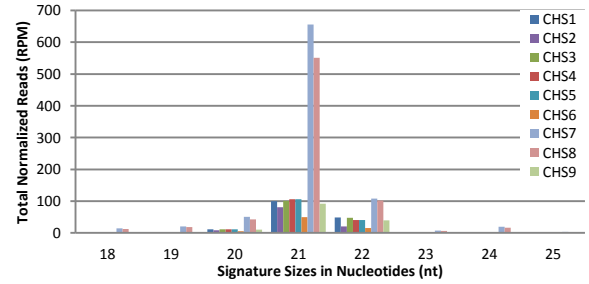

**H** 300-400 mg seed wt desiccating seed coat

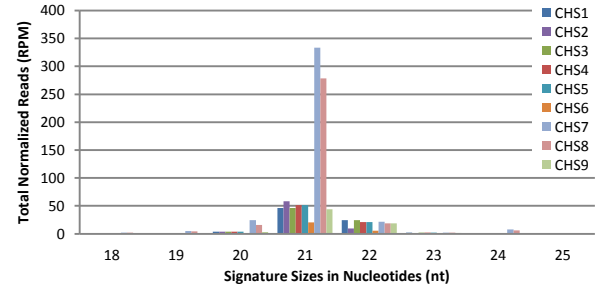

Supplement: pone.0076954.s002.pdf [file pone.0076954.s002.pdf]
