# Supplementary material for: The Transition from Primary siRNAs to Amplified Secondary siRNAs That Regulate Chalcone Synthase During Development of Glycine max Seed Coats
Source: PubMed Central journal article supplement (PMC3804491; doi:10.1371/journal.pone.0076954), 2013-10-21

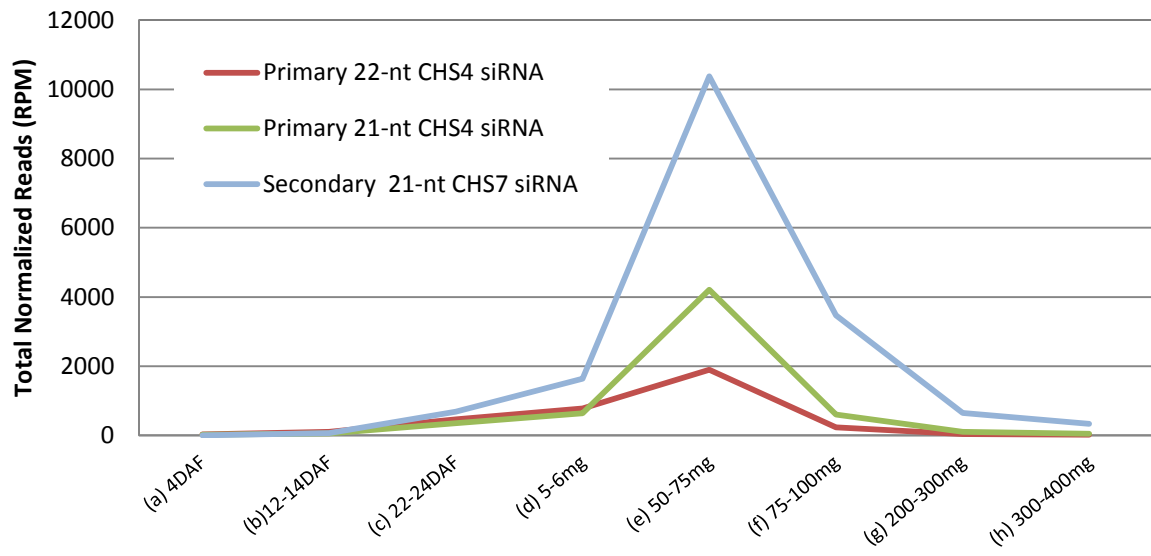

Supplement: pone.0076954.s003.pdf [file pone.0076954.s003.pdf]
