# Supplementary material for: The Transition from Primary siRNAs to Amplified Secondary siRNAs That Regulate Chalcone Synthase During Development of Glycine max Seed Coats
Source: PubMed Central journal article supplement (PMC3804491; doi:10.1371/journal.pone.0076954), 2013-10-21
Supplement: pone.0076954.s004.pdf [file pone.0076954.s004.pdf]

```

Query 860  CGCTGTCATTGTTGGATCAGACCCCTT---ACCAGTTGAAAAGCCTTTGTTTCAGCTTGT 916
      || ||||| ||||| || ||||| |  || ||||| ||||| ||||| |||||
Sbjct 860  TGCAGTCATTGTTGGTTCTGACCCAATTCCACAAGTTGAGAAGCCTTTGTATGAGCTTGT 919

Query 917  CTGGACTGCCAGACAATCCTTCCAGACAGTGAAGGGGCTATTGATGGACACCTTCGCGA 976
      ||||| || |||||  ||||| ||||| ||||| ||||| ||||| ||||| ||
Sbjct 920  TTGGACTGCACAAACAATTGCTCCAGACAGTGAAGGTGCTATTGATGGACACCTTCGTGA 979

Query 977  AGTTGGTCTCACTTTCCATCTCCTCAAGGATGTTCTGGACTCATCTCCAAGAATATTGA 1036
      ||||| ||||| || || ||||| ||||| ||||| || || ||||| |||||
Sbjct 980  AGTTGGACTCACATTTACCTCCTCAAGGATGTTCCCGGATTGTCTCAAAGAACATTGA 1039

Query 1037  GAAGGCCTTGGTTGAAGCCTTCCAACCTTGGGAATCTCCGATTACAATCTATCTTCTG 1096
      ||||| |  |||| || ||| | || ||||| ||||| ||||| || ||||| ||
Sbjct 1040  TAAGGCACTTTTTGAGGCTTCAACCCATTGAACATCTCTGATTACAACCTCATCTTTTG 1099

Query 1097  GATTGCACACCCTGGTGGACCCGCAATTTTGGACCAAGTGGAGGCTAAGTTAGGCTTGAA 1156
      ||||| ||||| ||||| || || ||||| ||||| ||||| ||||| || || ||
Sbjct 1100  GATTGCACACCCTGGTGGGCTGCGATTTTAGACCAAGTTGAGCAAAAGTTGGGTCTCAA 1159

Query 1157  GCCTGAAAAAATGGAAGCTACTAGGCATGTGCTCAGCGAGTATGGTAACATGTCAAGTGC 1216
      ||||| || ||| | || ||||| ||||| || || ||||| ||||| |||||
Sbjct 1160  ACCTGAGAAGATGAAGGCCACTAGAGATGTGCTTAGTGAATATGGGAACATGTCAAGTGC 1219

Query 1217  ATGTGTGCTATTTCATCTTGGATCAAATGCGGAAGAAATCAATAGAAAATGGACTTGGCAC 1276
      ||||| || ||||| ||||| | || || |||||  ||||| ||||| |  ||
Sbjct 1220  TTGTGTTCTTTTCATCTTGGATGAGATGAGGAGGAAATCTGCTGAAAATGGACATAAAAC 1279

Query 1277  AACCGGCGAAGGCCTTGACTGGGGTGTGCTATTTGGTTTCGGTCCTGGACTCACTGTTGA 1336
      || || ||||| ||||| ||||| || || ||||| || ||||| || |||||
Sbjct 1280  CACAGGTGAAGGACTTGAATGGGGTGTGTTGTTTCGGTTTGGACCTGGACTTACCATTGA 1339

Query 1337  GACTGTTGT 1345
      |||||
Sbjct 1340  AACTGTTGT 1348

```

**Figure S4. Alignment of *CHS4* and *CHS7* Coding Regions Shows that Polymorphisms are Widely Dispersed throughout the Two Sequences.** The longest contiguous sequences, which align to both genes without mismatch, are only 20 nt. These characteristics of the *CHS* gene family enable us to distinguish primary *CHS4* and secondary *CHS7* siRNAs by filtering their sequences to obtain only those with 100% identity. Primary *CHS4* siRNAs with one- or two-base mismatches to the target *CHS7* transcripts enable down-regulation of the target sequence.
